# Supplementary material
Source: PubMed Central journal article supplement (PMC4764128)
Supplement: NIHMS720972-supplement-02.pdf [file NIHMS720972-supplement-02.pdf]

**T417/1A418,419 KIT D4D5**

|                                 |                                 |
|---------------------------------|---------------------------------|
| X-ray source                    | NSLS X25                        |
| Number of crystals              | 1                               |
| Wavelength (Å)                  | 1.1000                          |
| Unit Cell dimensions            | C2                              |
| a (Å)                           | 163.6                           |
| b (Å)                           | 63.5                            |
| c (Å)                           | 81.5                            |
|                                 | $\beta=117.4$                   |
| Resolution (Å) <sup>a</sup>     | 50-2.4 (2.49-2.40)              |
| No. of total reflections        | 178278                          |
| No. of unique reflections       | 29387                           |
| Completeness (%) <sup>a</sup>   | 99.9 (98.7)                     |
| Number of degrees collected (°) | 330                             |
| Redundancy <sup>a</sup>         | 6.1 (5.3)                       |
| $I/\sigma I$ <sup>a</sup>       | 15.5 (2)                        |
| $R_{sym}$ (%) <sup>a</sup>      | 10.8 (82.4)                     |
| Wilson B                        | 56.8                            |
| <b>Refinement</b>               |                                 |
| Resolution (Å) <sup>a</sup>     | 42.4 – 2.4 (2.49 – 2.4)         |
| $R_{work}$ (%) <sup>a</sup>     | 23.2 (31.8)                     |
| $R_{free}$ (%) <sup>a</sup>     | 26.2 (37.6)                     |
| No. of atoms                    |                                 |
| Protein                         | 4402                            |
| N-acetylglucosamine             | 42                              |
| Water                           | 82                              |
| Cobalt                          | 5                               |
| <b>Residue range built</b>      |                                 |
| Chain A                         | 308-506                         |
| Chain B                         | 309-423/426-505                 |
| Chain C                         | 308-420/425-443/459-478/491-506 |
| <b>Model quality</b>            |                                 |
| Rmsd bond length (Å)            | 0.0024                          |
| Rmsd bond angles (°)            | 0.71                            |
| <b>B-factor (Å<sup>2</sup>)</b> |                                 |
| Average overall                 | 79.6                            |
| Chain A                         | 73.5                            |
| D4                              | 66.2                            |

|         |       |
|---------|-------|
| D5      | 80.8  |
| Chain B | 88.5  |
| D4      | 83.5  |
| D5      | 93.8  |
| Chain C | 77.6  |
| D4      | 63.9  |
| D5      | 99.6  |
| Water   | 60.1  |
| Cobalt  | 92.6  |
| NAG     | 126.6 |

### **MolProbity**

Ramachandran plot (%) favored/outliers

96/0

MolProbity score

1.5 (99<sup>th</sup> percentile)

**PDB Accession Code**

4PGZ
